# Supplementary material for: C-, N-, S-, and F-Doped Anatase TiO2 (101) with Oxygen Vacancies: Photocatalysts Active in the Visible Region
Source: Hindawi journal article supplement (doi:10.1155/2018/7506151), 2018-06-10
Supplement: f1 [file 7506151.f1.pdf]

# C, N, S, and F-doped anatase TiO<sub>2</sub> (101) with oxygen vacancies: Photocatalysts active in the visible region

Julio César González-Torres,<sup>1</sup> Enrique Poulain,<sup>1</sup> Víctor Domínguez-Soria,<sup>2</sup> Raúl García-Cruz,<sup>1</sup> and Oscar Olvera-Neria\*,<sup>1</sup>

<sup>1</sup>Área de Física Atómica Molecular Aplicada (FAMA), CBI, Universidad Autónoma Metropolitana-Azcapotzalco, Av. San Pablo 180, Col. Reynosa Tamaulipas, Ciudad de México, 02200, México.

<sup>2</sup>Área de Química Aplicada, CBI, Universidad Autónoma Metropolitana-Azcapotzalco, Av. San Pablo 180, Col. Reynosa Tamaulipas, Ciudad de México, 02200, México.

Corresponding author:

\*Oscar Olvera-Neria: e-mail [oon@correo.azc.uam.mx](mailto:oon@correo.azc.uam.mx), Tel. +52-55-53189505

**Supplementary Materials**

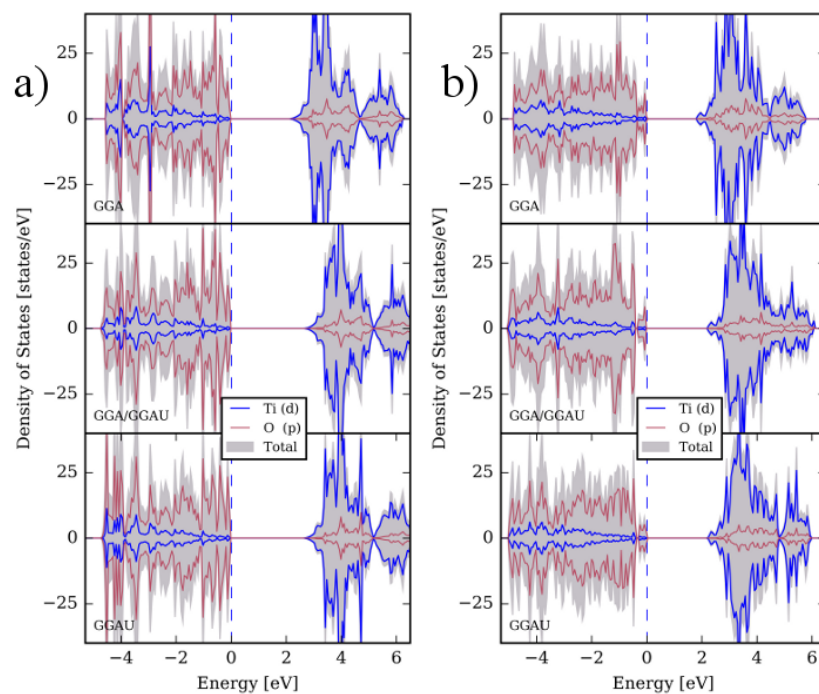

**Figure S1.** The total and partial density of states of the three relaxation methodologies for anatase  $\text{TiO}_2$ . a) The bulk supercell; b) The  $\text{TiO}_2$  (101) surface. The Fermi level corresponds to the zero energy.

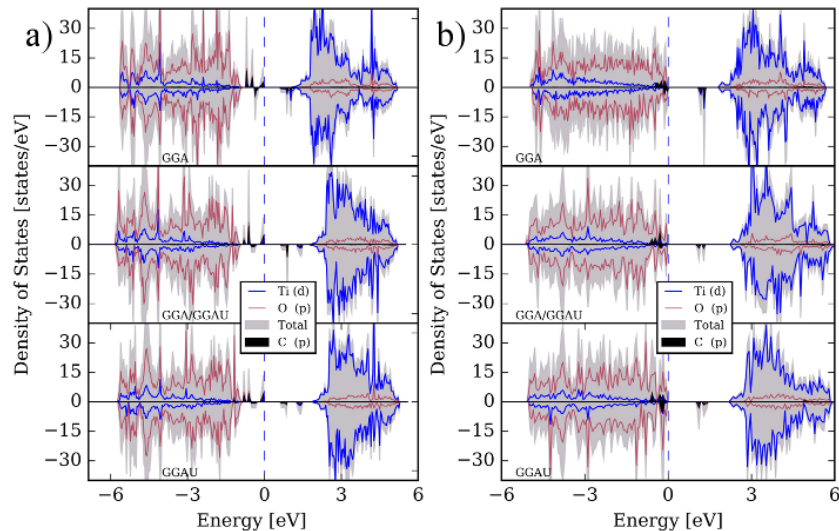

**Figure S2.** The total and partial density of states of the three relaxation methodologies for C-doped anatase  $\text{TiO}_2$ . a) The bulk supercell; b) The  $\text{TiO}_2$  (101) surface.

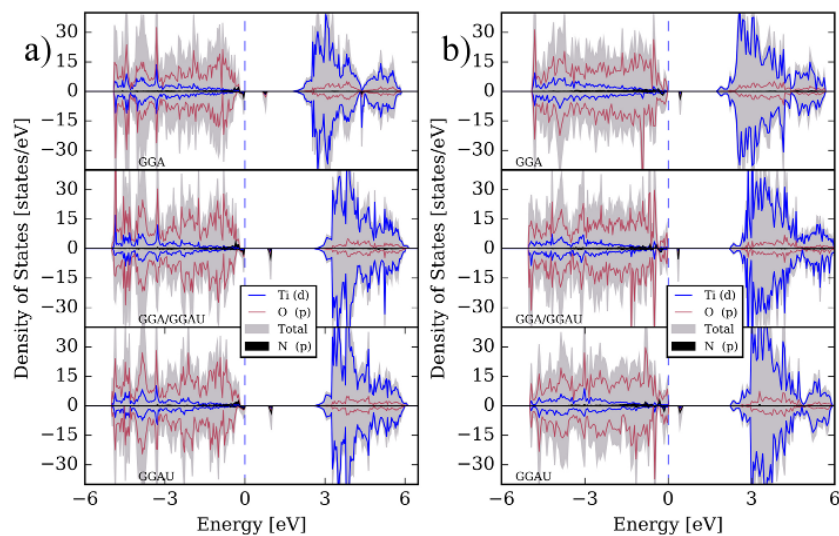

**Figure S3.** The total and partial density of states of the three relaxation methodologies for N-doped anatase  $\text{TiO}_2$ . a) The bulk supercell; b) The  $\text{TiO}_2$  (101) surface.

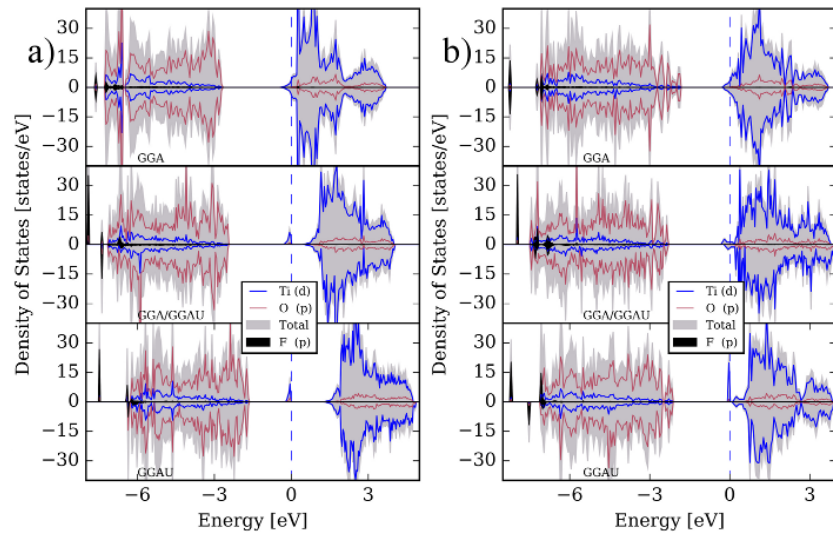

**Figure S4.** The total and partial density of states of the three relaxation methodologies for F-doped anatase  $\text{TiO}_2$ . a) The bulk supercell; b) The  $\text{TiO}_2$  (101).

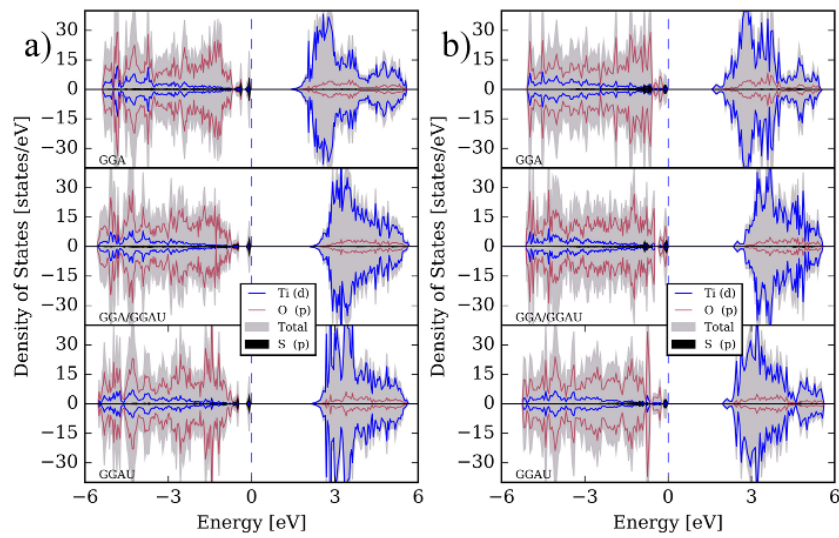

**Figure S5.** The total and partial density of states of the three relaxation methodologies for S-doped anatase  $\text{TiO}_2$ . a) The bulk supercell; b) The  $\text{TiO}_2$  (101) surface.
